# Supplementary material
Source: PubMed Central journal article supplement (PMC9189065)

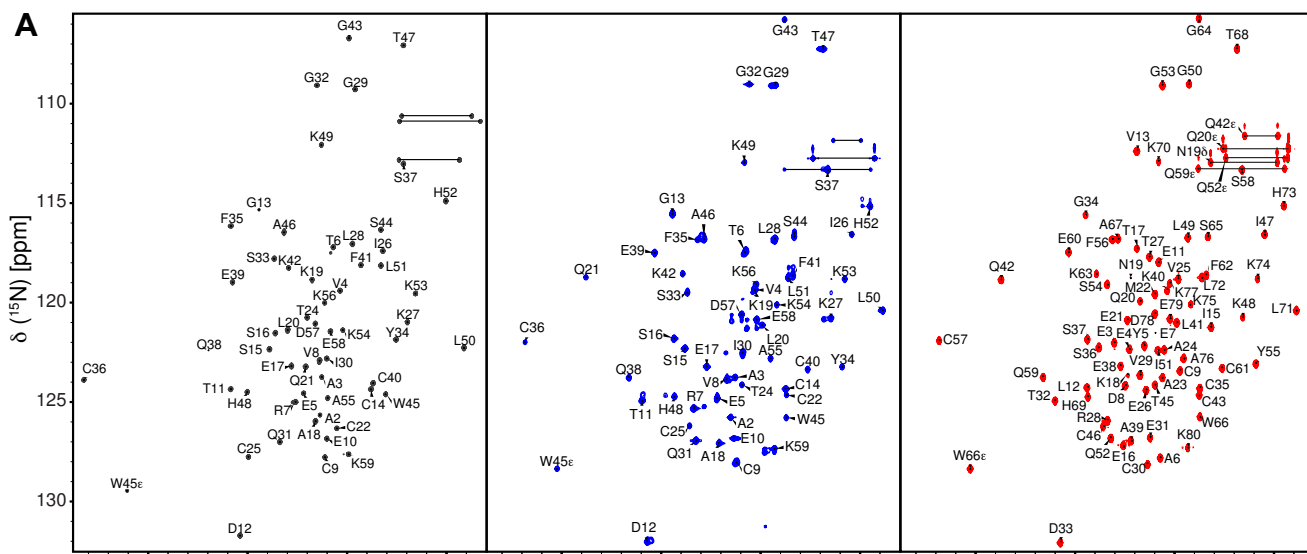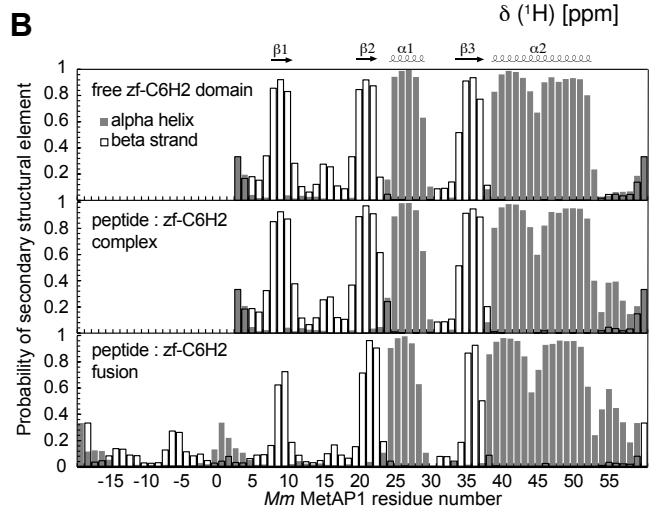

**C**

10 *Mm* ZNG 20 1 *Mm* METAP1 19  
 AEEEYAEDCP~~ELVP~~IE~~TKNQ~~EMA~~AV~~TRVC~~ETD~~GCSS~~EA~~K  
 20 40 59  
 LQCPTCIKLGIIQGSYFCSQECFKGSWATHKLLHKKAKDEK

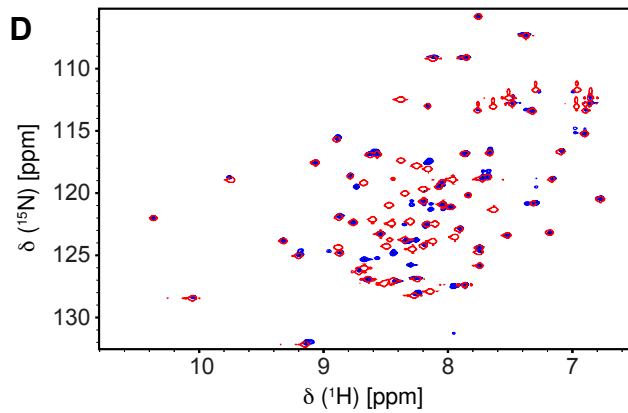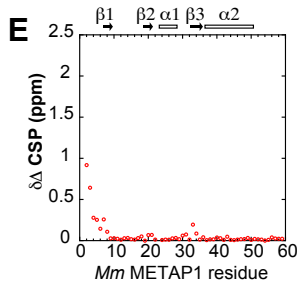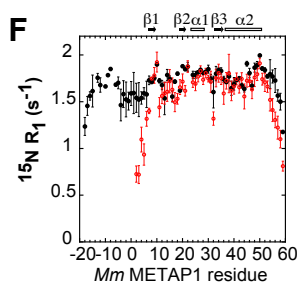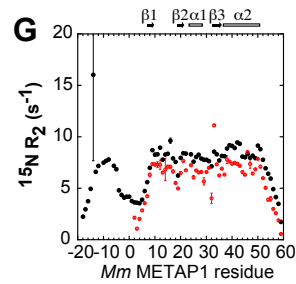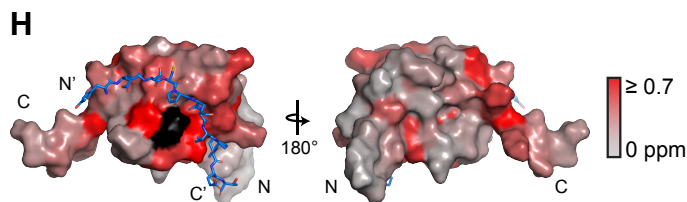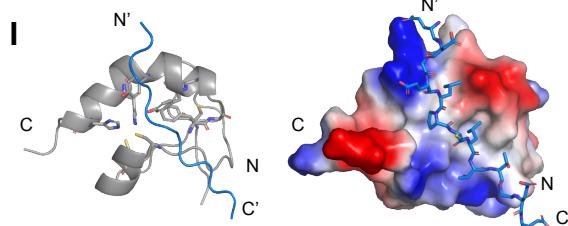

Supplement: NIHMS1797390-supplement-S3.pdf [file NIHMS1797390-supplement-S3.pdf]
