# Supplementary material
Source: PubMed Central journal article supplement (PMC9189065)

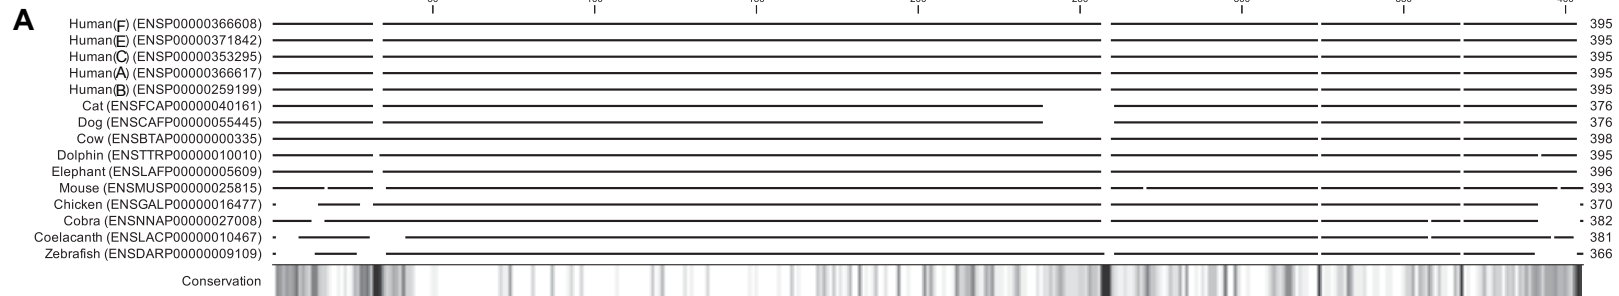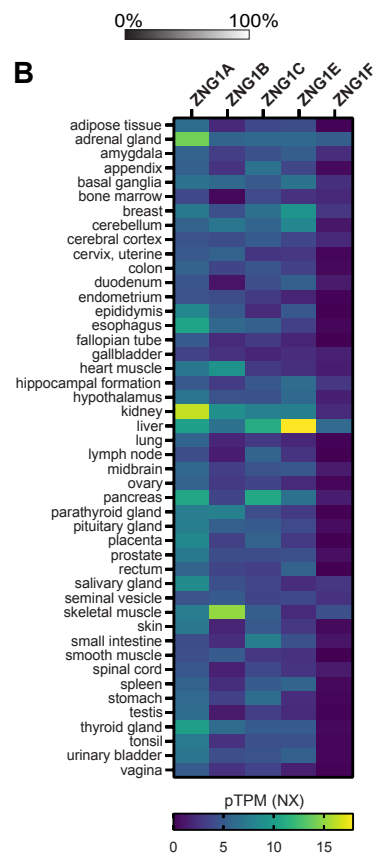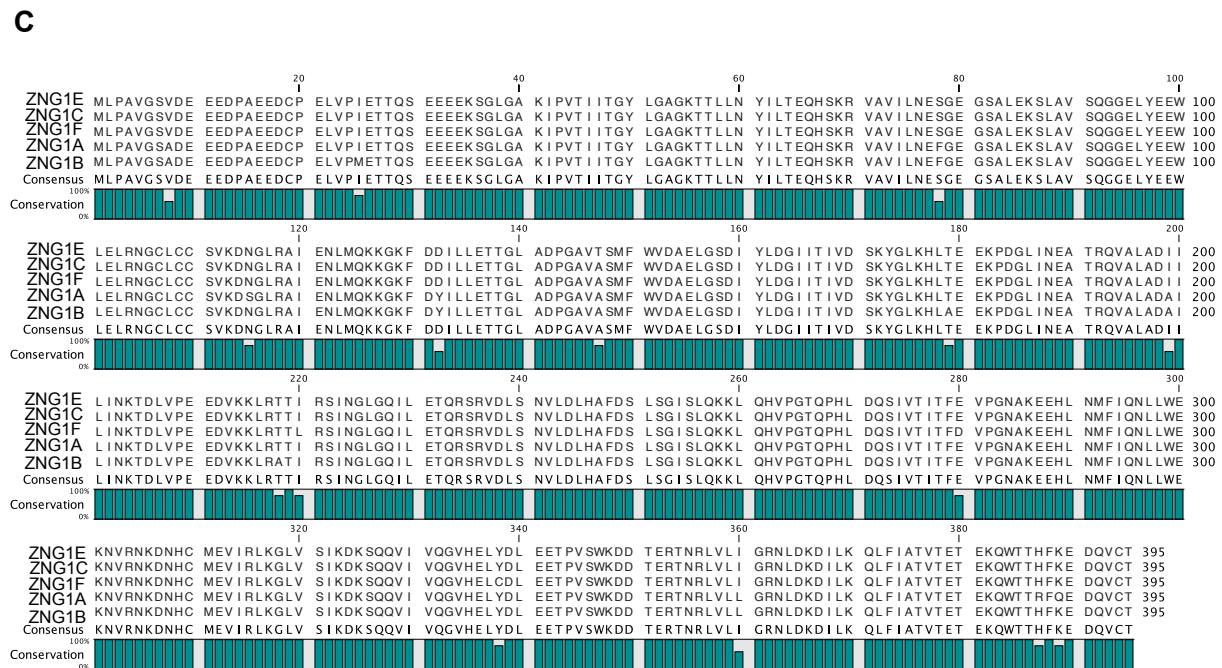

Supplement: NIHMS1797390-supplement-S1.pdf [file NIHMS1797390-supplement-S1.pdf]

**A**

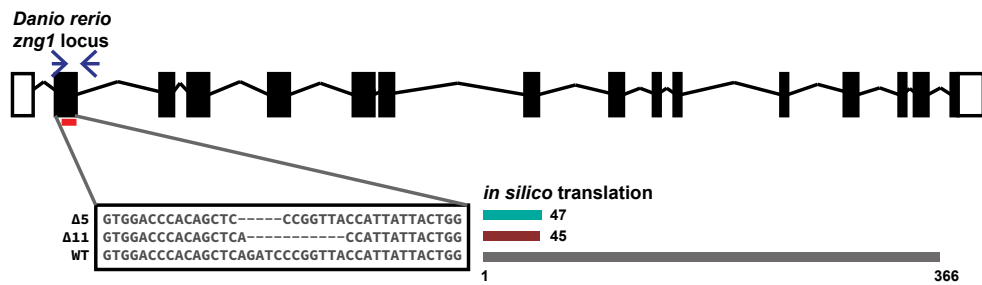

**B**

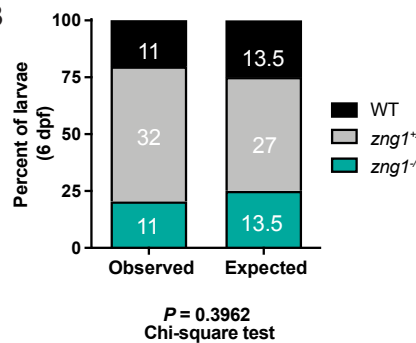

**C**

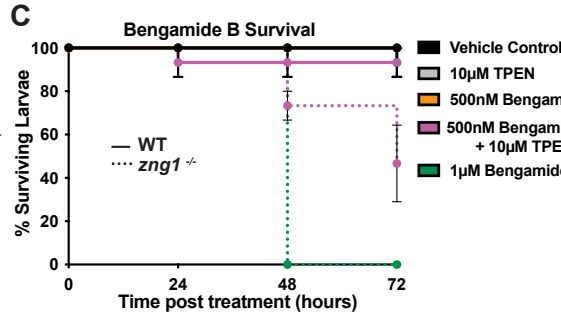

**D**

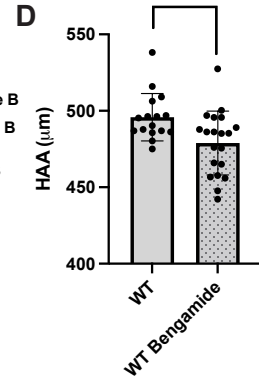

**E**

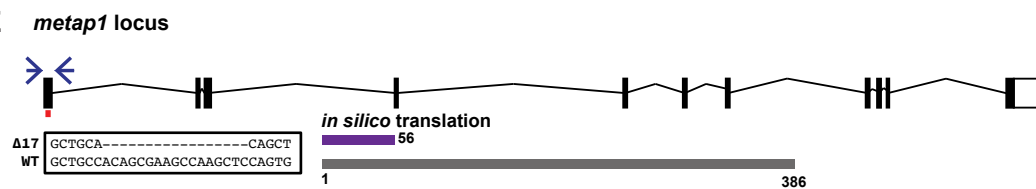

**F**

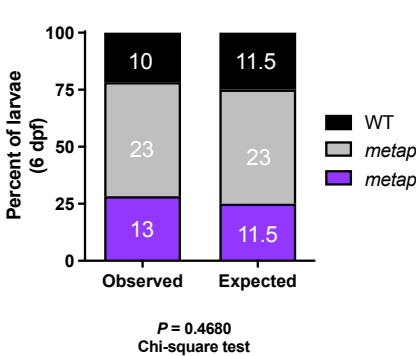

**G** Pathology Scoring Distribution

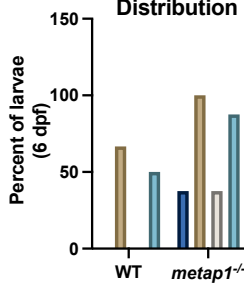

**H** Pathology Scoring Distribution

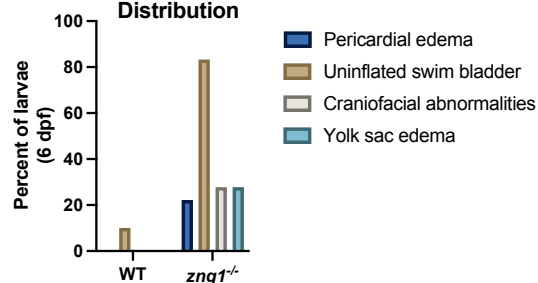

**I**

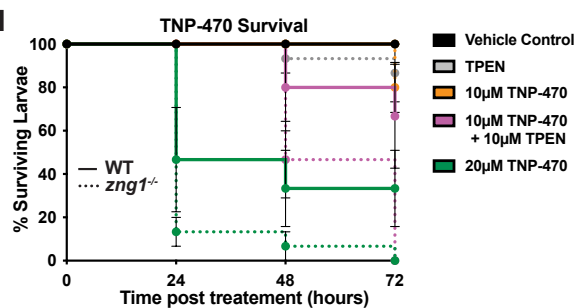

Supplement: NIHMS1797390-supplement-S5.pdf [file NIHMS1797390-supplement-S5.pdf]
